# Supplementary material
Source: PubMed Central journal article supplement (PMC6909701)
Supplement: Supp_Fig1.pdf [file Supp_Fig1.pdf]

## Supplementary Data

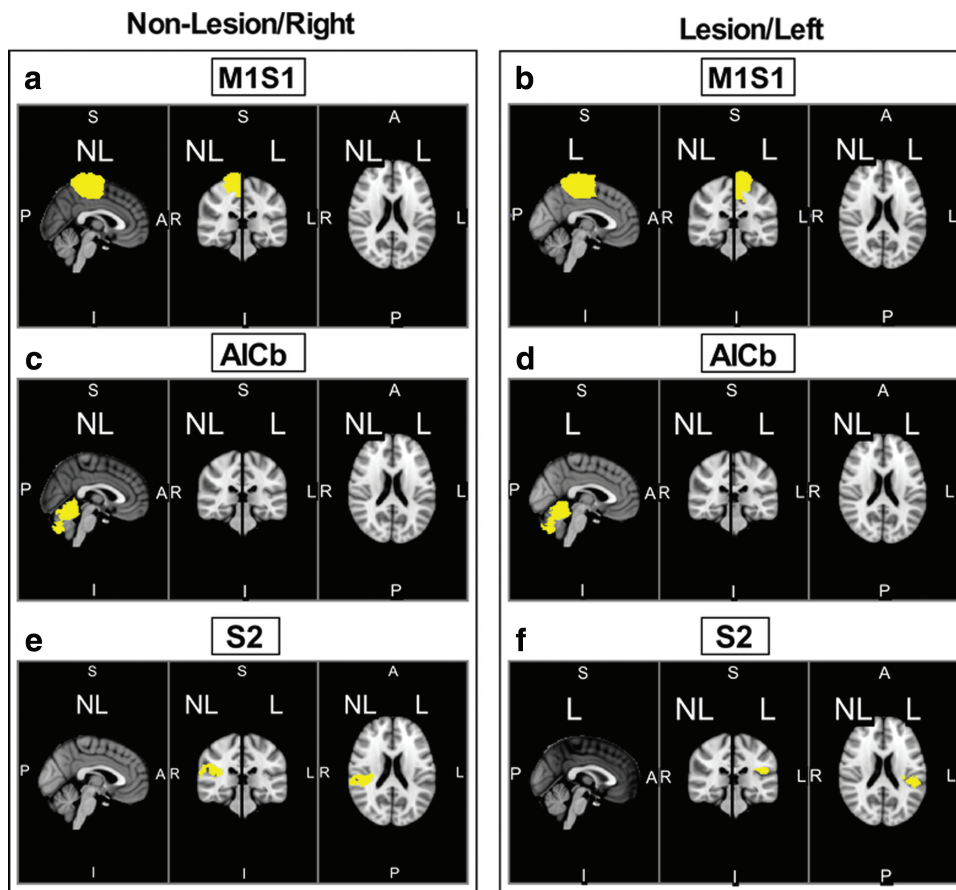

**SUPPLEMENTARY FIG. S1.** Task ROIs. Diagram of six task ROIs: M1S1 (a, b); AICb (c, d); S2 (e, f). The voxels comprising each ROI are shown in yellow on the Montreal Neurological Institute brain. The coordinates are  $Y = -30$  mm,  $Z = 20$  mm, and  $X = -2$  mm (left) or  $X = 2$  mm (right). AICb, anterior lobe of cerebellum; L, lesioned; M1S1, primary sensorimotor cortex; NL, non-lesioned; ROIs, regions of interest; S2, secondary sensory cortex.
